# Supplementary material for: Application of Microarray and Functional-Based Screening Methods for the Detection of Antimicrobial Resistance Genes in the Microbiomes of Healthy Humans
Source: PLoS One. 2014 Jan 22;9(1):e86428. doi: 10.1371/journal.pone.0086428 (PMC3899262; doi:10.1371/journal.pone.0086428)
Supplement: Table S1 — DNA concentrations of samples. (XLSX) [file pone.0086428.s001.xlsx]

## Sheet: Sheet1
Table S1. DNA concentrations of samples.
Sample	DNA concentration (ng / ml)
Finland Saliva	30
France Saliva	60
Italy Saliva	84
Norway Saliva	188
Scotland Saliva	46
Finland Faecal	212
France Faecal	273
Italy Faecal	212
Norway Faecal	230
Scotland Faecal	278
