# Supplementary material for: Application of Microarray and Functional-Based Screening Methods for the Detection of Antimicrobial Resistance Genes in the Microbiomes of Healthy Humans
Source: PLoS One. 2014 Jan 22;9(1):e86428. doi: 10.1371/journal.pone.0086428 (PMC3899262; doi:10.1371/journal.pone.0086428)
Supplement: Table S3 — Microarray results obtained with DNA extracts from saliva and faecal samples. (XLSX) [file pone.0086428.s003.xlsx]

## Sheet: Sheet1
Supplementary Table 3. Microarray results obtained with DNA extracts from saliva and faecal samples.
Signals >= 0.2 were considered positive (indicated in green fill).
Probe	Antibiotic/Function	Gene	Finland_Saliva	France_Saliva	Italy_Saliva	Norway_Saliva	Scotland_Saliva	Finland_Faecal	France_Faecal	Italy_Feacal	Norway_Faecal	Scotlan_Faecal
prob_aac3Ia_1	Aminoglycoside	aac3-Ia	-0.15864	-0.0997935	-0.0101765	-0.020165	0.020845	-0.0258215	-0.014109	-0.00779	-0.0344825	0.017027
prob_aac3IVa_1	Aminoglycoside	aac3-IVa	-0.161569	-0.169993	-0.0190995	0.0030845	0.031206	-0.0219505	0.007185	-0.0221245	-0.030873	0.023817
hp_aphA_611	Aminoglycoside	aac6'-aph2'	-0.143828	0.384778	0.029448	0.162931	0.239116	-0.0263425	0.027074	-8.15e-05	-0.044343	0.0314
hp_aac6_611	Aminoglycoside	aac6'-Ib	-0.188107	-0.252995	-0.021282	-0.0163835	0.016784	-0.030832	-0.0163625	-0.0196095	-0.02642	0.050606
hp_aac6_612	Aminoglycoside	aac6'-Ib	-0.135249	-0.211746	-0.017246	-0.019233	0.031287	-0.026558	-0.010343	-0.01361	-0.0433115	0.026537
hp_aac6_615	Aminoglycoside	aac6'-Ib	-0.034142	0.0723425	-0.0104245	-0.0127555	0.003783	-0.0219425	-0.0172955	-0.018125	-0.0364185	0.007541
prob_aac6Ib_1	Aminoglycoside	aac6'-Ib	-0.204712	-0.104251	-0.0016125	0.0078665	0.509851	-0.020648	-0.0156015	-0.0125375	0.020012	0.038862
hp_aac6_617	Aminoglycoside	aac6'-IIc	-0.138714	-0.26127	0.013791	0.087065	0.025052	-0.0212925	0.0134025	0.0008605	0.120395	0.022419
prob_aadA1_1	Aminoglycoside	aadA1-like	-0.162475	-0.131751	-0.0309855	-0.0268485	0.021543	0.0485525	0.0495565	-0.009041	0.018295	0.017247
prob_aadA2_1	Aminoglycoside	aadA2-like	-0.171623	-0.180673	-0.023179	-0.0243675	0.000707	-0.033423	-0.023236	-0.01696	-0.046499	-0.004359
prob_aadA4_1	Aminoglycoside	aadA4-like	-0.161553	-0.127414	-0.022393	-0.0024435	0.058866	-0.0176565	0.0480385	0.019354	-0.0403645	0.044275
hp_aadB_611	Aminoglycoside	aadB	-0.191419	-0.163321	-0.035647	0.0166195	0.006912	-0.0274165	-0.0465695	-0.02747	-0.043811	-0.015236
hp_aadB-2_611	Aminoglycoside	aadB	0.257783	0.524333	0.088535	0.0703145	0.154218	-0.01832	-0.019031	0.0216765	-0.0258515	0.022505
prob_ant2Ia_1	Aminoglycoside	aadB	-0.185115	-0.183744	-0.032117	-0.033991	0.01665	-0.0235245	-0.022268	-0.030283	-0.061968	0.031426
hp_armA_611	Aminoglycoside	armA	-0.15242	-0.214472	-0.0353375	-0.0306095	0.029657	-0.034841	-0.016647	-0.0136045	-0.0391815	0.003258
hp_rmtC_611	Aminoglycoside	rmtC	-0.281019	-0.119699	-0.0212085	-0.0406035	0.028008	-0.0252895	-0.0277975	0.015562	-0.0480565	0.012044
prob_strA_611	Aminoglycoside	strA	-0.150932	-0.106512	0.0345115	-0.022866	0.012798	-0.021381	0.129312	0.818725	-0.0312745	0.01675
prob_strB_611	Aminoglycoside	strB	-0.174626	-0.113384	-0.0085605	-0.0149995	0.010221	-0.017631	0.640063	0.885134	-0.0083345	0.025348
prob_acc1_11	Beta-lactam	blaACC-1	-0.20423	-0.213956	-0.0250575	-0.0324125	0.019891	-0.023498	-0.0308015	-0.0086335	-0.05083	0.006241
prob_acc2_11	Beta-lactam	blaACC-1	-0.279409	-0.261658	-0.0250535	-0.037133	0.011593	-0.0310055	-0.0159405	-0.033485	-0.061347	0.006204
hp_blaCMY_611	Beta-lactam	blaCMY	-0.121954	-0.127996	0.0870005	0.182494	0.06461	-0.027019	-0.018894	0.0059915	-0.0386315	0.034885
hp_blaCMY_612	Beta-lactam	blaCMY	-0.0943495	-0.109238	0.0643145	0.155197	0.073094	-0.0210715	0.096293	-0.002561	-0.0347995	0.077881
prob_cmy_11	Beta-lactam	blaCMY	-0.127325	-0.133211	-0.013627	0.003822	0.044794	-0.0184985	-0.016334	0.0691255	0.105857	0.084045
prob_ctxM1_11	Beta-lactam	blaCTX-M-1	-0.180542	-0.21151	0.0064445	0.0181475	0.014396	0.0533535	0.0009665	-0.001619	0.0379405	0.009516
prob_ctxM1_12	Beta-lactam	blaCTX-M-1	-0.16982	-0.151183	-0.0179215	-0.0099375	0.001679	0.018668	-0.013658	-0.014754	0.007354	0.062095
prob_ctxM2_11	Beta-lactam	blaCTX-M-2	-0.15948	-0.12891	-0.013635	-0.014418	0.013824	0.0619325	0.003265	-0.004834	0.089294	0.038811
prob_ctxM26_11	Beta-lactam	blaCTX-M-26	-0.170722	-0.121506	-0.016293	-0.0154275	0.004103	-0.0169795	-0.011285	-0.0136265	-0.039448	0.01466
prob_ctxM8_11	Beta-lactam	blaCTX-M-8	-0.161085	-0.157161	-0.0144265	-0.019286	-0.005628	0.015094	0.000821	0.00849	0.035934	-0.001852
prob_ctxM9_11	Beta-lactam	blaCTX-M-9	-0.143697	-0.117689	-0.0155125	-0.036801	0.012858	-0.0197065	-0.005072	-0.0099695	-0.0218075	0.006155
prob_dha1_1	Beta-lactam	blaDHA-1	-0.202515	-0.210366	0.08762	-0.02711	0.025593	-0.0207355	-0.0297235	-0.032739	-0.0458555	0.043639
prob_fox_11	Beta-lactam	blaFOX	-0.262468	-0.126651	-0.035619	-0.031168	0.025918	-0.0300245	-0.0360225	-0.0118835	-0.0631565	0.109953
hp_ges-1_611	Beta-lactam	blaGES	-0.127546	-0.212862	-0.0333615	-0.0012605	0.012432	0.018069	0.001459	0.0021425	-0.0047035	0.007956
hp_gim1_611	Beta-lactam	blaGIM-1	-0.146834	-0.154761	-0.037991	-0.0038725	0.042534	-0.031427	-0.009094	-0.0152895	-0.0395905	0.008683
hp_imi3_611	Beta-lactam	blaIMI3	-0.110354	-0.26781	0.020342	0.037541	-0.002084	-0.031125	-0.0223955	-0.0332065	-0.044766	0.01111
hp_imp_611	Beta-lactam	blaIMP	-0.175358	-0.2227	-0.016938	-0.016834	0.390699	0.140878	0.0252285	-0.0226885	0.231434	0.080301
hp_imp_612	Beta-lactam	blaIMP	0.330751	-0.162513	0.008265	-0.0271205	0.158691	-0.018534	-0.0235395	-0.0020035	-0.02627	0.016844
hp_imp_613	Beta-lactam	blaIMP	-0.219374	-0.233377	-0.014982	0.0586565	0.009027	-0.0188535	0.0994725	-0.0212465	0.111219	0.029989
hp_imp_614	Beta-lactam	blaIMP	-0.148805	-0.294959	-0.014822	-0.02977	0.014145	-0.020956	-0.0206605	-0.020584	-0.0309225	0.00526
hp_imp_615	Beta-lactam	blaIMP	-0.142389	-0.172681	-0.0206145	-0.0246945	0.015638	-0.009745	-0.0214645	-0.018689	-0.027926	0.001981
hp_imp_616	Beta-lactam	blaIMP	-0.21557	-0.196777	0.0283325	0.202702	0.006957	-0.0221585	-0.0238065	-0.021806	-0.039593	0.007788
hp_imp_617	Beta-lactam	blaIMP	-0.143367	-0.127601	-0.0198465	-0.0220015	0.032591	-0.0200465	-0.03034	0.023692	-0.0151855	0.032316
hp_blaKHM-1_611	Beta-lactam	blaKHM	-0.207212	-0.289355	-0.0196485	-0.013247	0.003043	-0.0222315	-0.0170365	-0.0264895	-0.0435415	0.023416
hp_kpc4_611	Beta-lactam	blaKPC-4	-0.170568	-0.18627	0.148149	0.0940985	0.038683	-0.017427	-0.0299625	0.031751	-0.033597	-0.008739
prob_mox_1pm	Beta-lactam	blaMOX	-0.224353	-0.215563	-0.013823	-0.020451	-0.006291	-0.019358	-0.0278075	-0.021084	-0.0215425	0.003358
hp_blaMOX-CMY9_613	Beta-lactam	blaMOX, blaCMY	-0.202153	-0.171495	0.131514	0.172935	0.012798	-0.0168285	0.21323	-0.0059845	-0.0406705	0.018953
prob_oxa1_21	Beta-lactam	blaOXA-1	-0.260359	-0.197433	0.095786	0.109732	0.025399	0.120445	0.028414	-0.0072185	0.161499	0.031958
prob_oxa2_11	Beta-lactam	blaOXA-2	-0.181095	-0.138946	0.036078	0.012131	0.031564	0.077226	-0.0069175	0.0001695	0.067183	0.070588
hp_oxa_611	Beta-lactam	blaOXA-23	-0.171199	-0.196646	-0.019717	0.0489215	0.021324	-0.029319	-0.014061	-0.01565	0.001984	0.037459
hp_oxa_612	Beta-lactam	blaOXA-40	-0.135759	-0.248283	-0.029312	-0.017238	-0.001129	-0.0351975	-0.019171	-0.0229385	-0.0422475	0.017106
hp_oxa_613	Beta-lactam	blaOXA-48	-0.187388	-0.277465	-0.024918	-0.0102835	0.005066	-0.035754	-0.013341	-0.018305	-0.0389315	0.000651
hp_oxa_614	Beta-lactam	blaOXA-51	-0.200525	-0.161926	0.040609	-0.0126585	0.029582	-0.022626	0.039994	-0.015489	-0.0328615	0.013188
hp_oxa_617	Beta-lactam	blaOXA-58	-0.140946	-0.194607	-0.013504	-0.0023535	-0.011494	-0.023198	0.0274145	0.0068175	-0.037042	0.005696
prob_oxa7_11	Beta-lactam	blaOXA-7	-0.198889	-0.141646	0.008848	0.0795475	0.014486	0.0066995	0.154909	0.0042005	-0.013875	0.026572
prob_oxa9_11	Beta-lactam	blaOXA-9	-0.100035	-0.104229	0.0078735	0.0119295	0.0392	0.041303	0.014955	0.0376085	0.0724855	0.044271
hp_per1_611	Beta-lactam	blaPER-1	-0.088612	-0.215486	-0.0237805	-0.0118275	0.045415	-0.024345	-0.0247195	-0.008138	-0.034846	0.009818
prob_pse1_1mm	Beta-lactam	blaPSE-1-like	-0.114531	-0.139768	0.164357	0.169318	0.008398	0.031819	0.141504	0.022748	-0.0219215	0.014471
prob_pse1_1pm	Beta-lactam	blaPSE-1-like	-0.180029	-0.100091	0.0944635	0.0601745	0.018527	0.058047	0.191853	0.025271	0.07094	0.012063
prob_shv1_11	Beta-lactam	blaSHV	-0.177177	-0.130744	-0.019948	-0.024009	0.02203	0.0778065	-0.025182	-0.015345	0.053485	-0.001422
hp_spm1_611	Beta-lactam	blaSPM-1	-0.196726	-0.201759	-0.0181015	0.0037575	0.042909	-0.0181405	-0.0150545	-0.0215975	-0.0412525	0.014034
prob_tem1_1	Beta-lactam	blaTEM	0.774937	0.875137	0.435183	0.218764	0.035883	-0.019529	0.482662	-0.015685	0.160258	0.115515
hp_veb1_611	Beta-lactam	blaVEB-1	-0.151935	-0.268004	-0.009473	-0.001377	-0.003737	-0.0250595	0.0501405	-0.0039765	-0.0206995	0.011573
prob_catA1_11	Chloramphenicol	catA1	-0.265552	-0.216796	-0.041976	-0.0203515	0.015626	0.0333005	-0.0084165	-0.017413	-0.0355865	0.037559
prob_catB8_12	Chloramphenicol	catB8	-0.146231	-0.206882	0.070265	0.077481	0.075152	0.0352485	-0.0020235	0.024391	0.075967	0.064378
prob_cmlA1_11	Chloramphenicol	cmlA1-like	-0.173651	-0.198279	-0.0138905	-0.0095065	0.017447	0.0222355	-0.021319	0.0005785	-0.020324	0.046036
prob_floR_11	Chloramphenicol	floR-1	-0.213083	-0.145691	-0.0388275	-0.0335725	0.044929	-0.027029	-0.0310855	0.006952	-0.0497985	0.0427
Biotin-Marke_2,5µM	Control	Positive Control	0.883462	0.871505	0.870395	0.829656	0.781513	0.836771	0.751573	0.86227	0.865487	0.752058
hp_ereA_611	Erythromycin	ereA	-0.101782	-0.116514	0.103371	0.19894	0.01662	-0.0271535	0.24608	-0.0168115	0.070235	0.013461
hp_ereA_612	Erythromycin	ereA	-0.236463	-0.187984	-0.0298005	-0.0388305	-0.001063	-0.039402	-0.032411	-0.0231745	-0.0386305	0.068612
hp_ermB_611	Erythromycin	ermB	0.785562	0.857412	0.853892	0.538156	0.064426	0.823747	0.794569	0.862546	0.756804	0.699683
hp_ermB_612	Erythromycin	ermB	0.798134	0.840746	0.845276	0.51046	0.352924	0.80579	0.824948	0.869142	0.767772	0.770241
prob_intI1_1	Intergrase	intl1	-0.184605	-0.252424	-0.04163	-0.0264765	0.008378	-0.0167385	-0.025892	-0.0152315	-0.048027	0.014946
prob_intI2_11	Intergrase	intl2	-0.16709	-0.161432	0.027849	0.0487735	0.014539	-0.015496	-0.0030275	-0.002258	-0.0399455	0.02324
hp_mphA_611	Macrolide	mphA	-0.275858	-0.120303	-0.027428	-0.020548	-0.000801	-0.010081	-0.0210065	-0.0138885	-0.04168	0.008746
prob_qnr_11	Quinolone	qnrA	-0.136516	-0.110321	-0.017319	-0.0195505	-0.001536	0.0439975	0.004336	-0.0131325	0.039674	0.002956
hp_arr-1_611	Rifampin	arr-1	-0.246287	-0.21146	-0.0351175	-0.015274	0.030041	-0.026185	-0.015882	0.0449935	-0.0484055	0.009314
hp_vatE_612	Streptogramin	vatE	-0.0716515	0.397173	-0.011072	-0.035903	0.038659	-0.026857	-0.007215	-0.0169295	-0.0434585	0.026071
prob_sul1_11	Sulfonamide	sul1	-0.20613	-0.12225	0.0225455	0.026225	-0.002187	-0.022113	-0.008034	-0.0074545	-0.0381665	0.010983
prob_sul2_11	Sulfonamide	sul2	0.016692	0.308376	0.203883	0.248721	0.076728	0.172124	0.477727	0.871652	0.221122	0.177231
prob_sul3_11	Sulfonamide	sul3	-0.190809	-0.062976	-0.036662	-0.030926	0.070347	-0.019125	-0.026413	0.005223	-0.063364	0.021944
prob_tetA_11	Tetracycline	tetA	-0.238057	-0.111374	-0.049742	-0.015025	0.015209	-0.01766	-0.023831	-0.046309	-0.048874	0.02462
prob_tetB_11	Tetracycline	tetB	0.806793	0.792641	0.161876	0.304319	0.096984	-0.014209	0.057424	-0.025965	-0.040033	0.01989
prob_tetC_11	Tetracycline	tetC	-0.41667	-0.238181	-0.0566	-0.009418	0.026075	-0.022625	-0.022367	-0.022185	-0.053415	0.023562
prob_tetD_1	Tetracycline	tetD	-0.25859	-0.127885	-0.049578	0.004745	0.069796	-0.024394	-0.011864	-0.019634	-0.077903	0.112345
prob_tetE_11	Tetracycline	tetE	-0.274154	-0.160091	-0.033124	0.077004	0.050617	-0.028055	0.171817	-0.021787	-0.046209	0.045516
prob_tetG_11	Tetracycline	tetG	-0.338251	-0.174247	-0.02568	-0.014938	0.016928	-0.017564	-0.01299	-0.020735	-0.011428	0.021134
prob_tetG_12	Tetracycline	tetG	-0.22019	-0.24773	-0.020806	-0.017711	0.017739	-0.020391	-0.02411	-0.023641	0.164723	0.028218
hp_tetX_611	Tetracycline	tetX	-0.0982155	0.714849	0.061102	-0.0147215	0.095606	0.0165305	0.833608	0.875862	0.061687	0.206856
prob_dfrA1_21	Trimethoprim	dfrA01	-0.110579	-0.0958985	0.0080375	-0.026459	0.035444	-0.015703	0.0065955	-0.009809	-0.017292	0.071165
prob_dfrA1_22	Trimethoprim	dfrA01	-0.139793	-0.152305	-0.017973	-0.017876	0.047376	0.0789005	0.012478	-0.0241795	0.0934885	0.073637
prob_dfrA7_11	Trimethoprim	dfrA07	-0.105844	-0.0448395	-0.027255	-0.017732	0.061389	-0.019583	-0.025388	-0.012481	-0.032322	0.077257
prob_dfrA7_12	Trimethoprim	dfrA07	-0.219138	-0.235389	-0.0182865	-0.008684	0.019645	0.0431855	-0.025949	-0.0178705	-0.019531	-0.000447
prob_dfr12_11	Trimethoprim	dfrA12	-0.087179	-0.0409605	-0.0058915	-0.013603	0.01447	0.0102545	0.046853	0.0153115	0.034678	0.03251
prob_dfr13_11	Trimethoprim	dfrA13	-0.118781	-0.071756	0.0263395	0.008275	0.039877	-0.006986	0.0182655	0.0066515	0.018795	0.031381
prob_dfrA14_21	Trimethoprim	dfrA14	-0.118745	-0.153525	0.0131415	0.0297055	-0.021054	-0.0206925	0.359347	-0.008375	-0.03072	0.094692
prob_dfrA15_1	Trimethoprim	dfrA15	0.031587	0.0570135	-0.025324	-0.0227015	0.024193	-0.031316	0.0056825	0.0019185	-0.0278715	0.030512
prob_dfrA17_11	Trimethoprim	dfrA17	0.079979	-0.133033	-0.00037	0.040501	0.087532	-0.018169	0.003302	0.014563	-0.025343	0.026525
prob_dfrA19_1	Trimethoprim	dfrA19	-0.159651	-0.0988735	0.0003535	-0.0029435	0.070117	-0.0267355	-0.0186595	0.0087005	-0.028633	0.049844
